# Supplementary material
Source: Springer Nature journal article supplement (https://www.springermedizin.de/resource/supplementary/12914_2010_127_MOESM3_ESM.pdf/9536820)

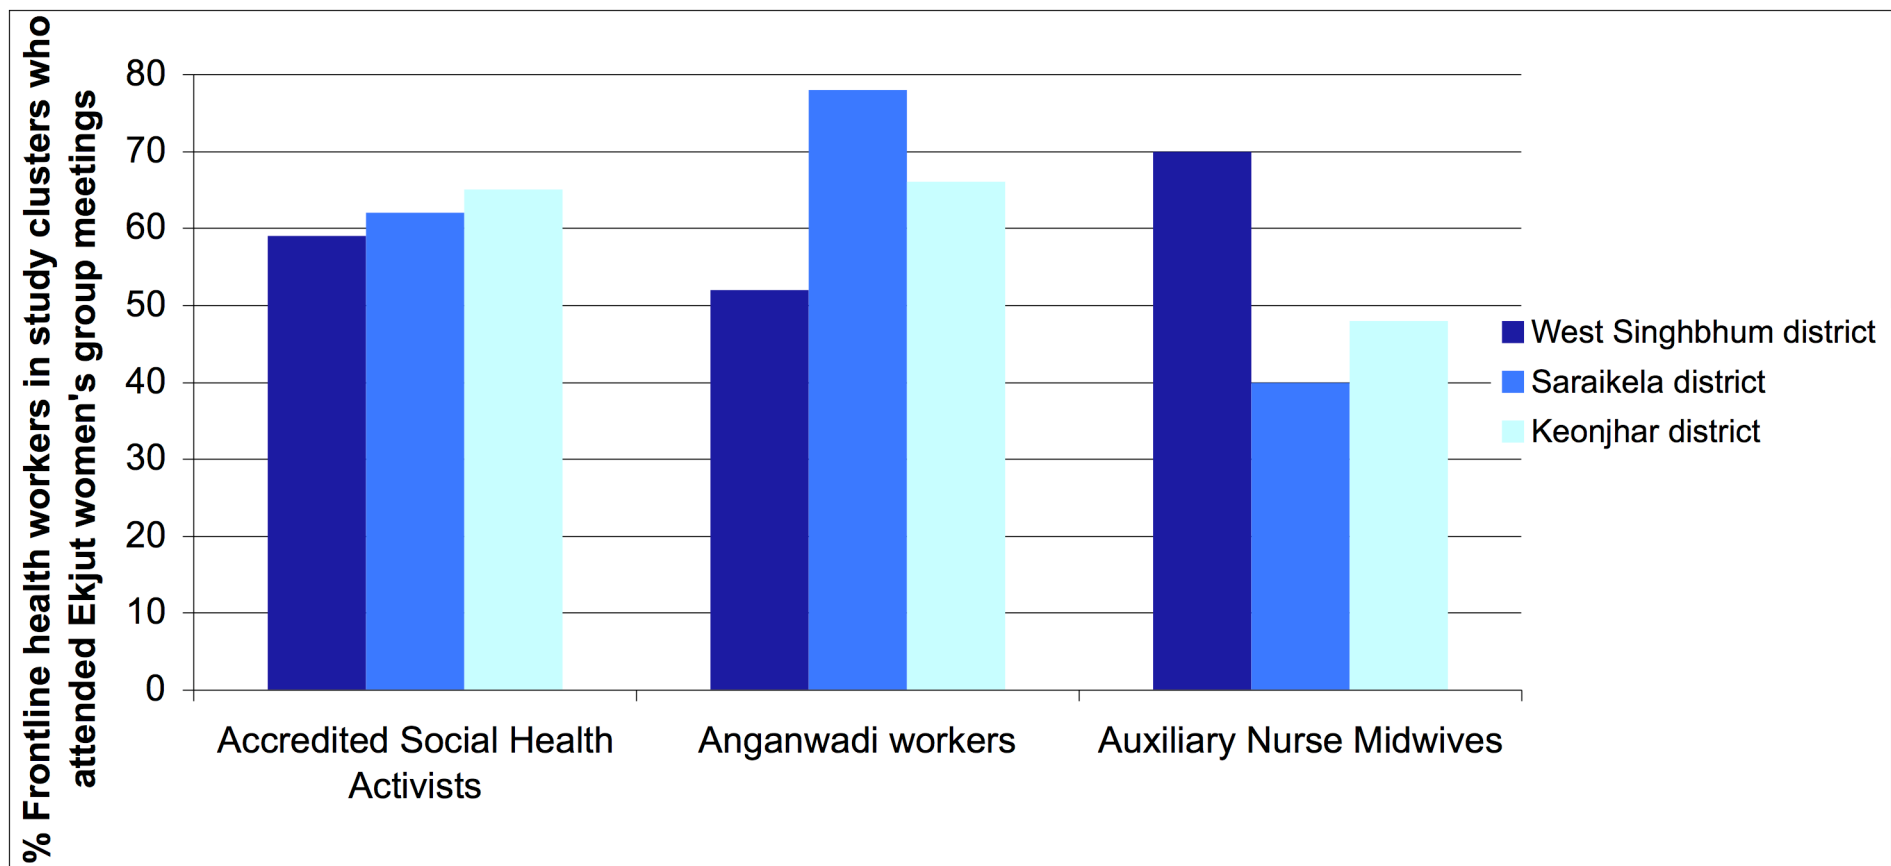

Supplement: MOESM3 [file 9536820]
